# Supplementary material
Source: PubMed Central journal article supplement (PMC6260782)
Supplement: NIHMS1501276-supplement-1.pdf [file NIHMS1501276-supplement-1.pdf]

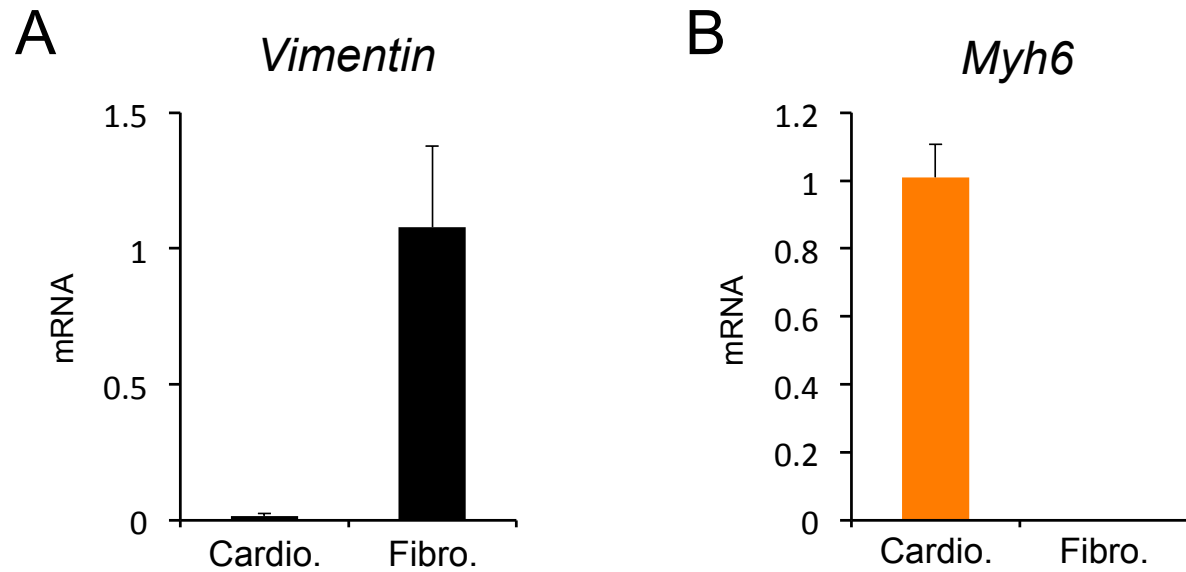

**Supplemental Figure 1.** qPCR analysis for *Vimentin* (**A**) and *Myh6* (**B**) mRNA expression normalized to *Rpl7* housekeeping gene in isolated cardiomyocytes (cardio.) or isolated cardiac fibroblasts (fibro.) n=3 biological replicates in each condition
